# Supplementary material for: Mapping the Multiple Health System Responsiveness Mechanisms in One Local Health System: A Scoping Review of the Western Cape Provincial Health System of South Africa
Source: PubMed Central journal article supplement (PMC9278388; doi:10.34172/ijhpm.2021.85), 2021-08-21
Supplement: ijhpm-11-67-s002.pdf [file ijhpm-11-67-s002.pdf]

**Article title:** Mapping the Multiple Health System Responsiveness Mechanisms in One Local Health System: A Scoping Review of the Western Cape Provincial Health System of South Africa

**Journal name:** International Journal of Health Policy and Management (IJHPM)

**Authors' information:** Tammy Suthers\*, Jill Olivier

Division of Health Policy and Systems, School of Public Health and Medicine, University of Cape Town, Cape Town, South Africa.

(\*Corresponding author: [tlsuth@gmail.com](mailto:tlsuth@gmail.com))

**Supplementary file 2.** Full List of South African National, Provincial and District Policies, Guidelines and Legislation Outlining Mechanisms for Receiving and Responding to Citizen Feedback

| <b>Policy/ evidence</b>                                     | <b>Mechanisms</b>                                                                                                                                             | <b>Responsiveness</b>                                                                                                                                                                                               | <b>Level</b>                   |
|-------------------------------------------------------------|---------------------------------------------------------------------------------------------------------------------------------------------------------------|---------------------------------------------------------------------------------------------------------------------------------------------------------------------------------------------------------------------|--------------------------------|
| SADOH White Paper <sup>1</sup>                              | Comprehensive Primary Health Care<br>Decentralization (District Health System)<br>NGOs<br>Committees<br>Community-based information systems<br>Health summits | Transformation of national health system, community participation in planning/provision of health care on each level of government.                                                                                 | National, provincial, district |
| SA's Patients' Rights Charter <sup>2</sup>                  | Information material                                                                                                                                          |                                                                                                                                                                                                                     | National, provincial, district |
| WC Health Facility Boards Act, 7 of 2001 <sup>3</sup>       | Health Facility Boards                                                                                                                                        | Ensure accountability of health facility management to community, responsiveness to needs of patients/their families.                                                                                               | Provincial                     |
| WC Government Health Annual Report 2002 – 2003 <sup>4</sup> | Monitoring client/patient complaints and compliments                                                                                                          | To identify the strengths/weaknesses of service delivery. Creation of HFBs achieved throughout the province, promotes representation, accessibility, openness and transparency. Findings of annual survey analysed, | Provincial                     |

|                                                              |                                                                                                                                                                                |                                                                                                                                                                                                                                                                        |                                |
|--------------------------------------------------------------|--------------------------------------------------------------------------------------------------------------------------------------------------------------------------------|------------------------------------------------------------------------------------------------------------------------------------------------------------------------------------------------------------------------------------------------------------------------|--------------------------------|
|                                                              |                                                                                                                                                                                | addressed with quality improvement plans formulated.                                                                                                                                                                                                                   |                                |
| SA National Health Act No. 61 of 2003 <sup>5</sup>           | Decentralisation<br>District health councils<br>Hospital Boards<br>Health Committees<br>Health Professional's Council<br>Ombud<br>Office of Health Standards Compliance (OHSC) | Governance between national/provincial/local spheres, PHC approach/district health system model, decentralisation. Minister must appoint HFBs for each central hospital or group of hospitals, including 3 representatives of the communities served by the hospitals. | National, provincial, district |
| Having your say: A handbook for Ward Committees <sup>6</sup> | Ward committees                                                                                                                                                                | Representative structure of community/citizens, need to inform the municipality about aspirations, potentials and problems of the people.                                                                                                                              | Provincial, District           |
| WC Government Health Annual Report 2004 – 2005 <sup>7</sup>  | CSS                                                                                                                                                                            | Report evaluates percentage of facilities that conducted external client satisfaction survey, published results, developed action plans for improvement.                                                                                                               | Provincial                     |
| WC Government Health Annual Report 2006- 2007 <sup>8</sup>   | Annual CSS – every 12 months                                                                                                                                                   | Negative feedback reported on, including client safety, waiting times, public transport, along with strategies for addressing these.                                                                                                                                   | Provincial                     |
| WC Health Facility Boards – Manual 2007 <sup>9</sup>         |                                                                                                                                                                                | Highlights how Board is accountable to community, patients, their families.                                                                                                                                                                                            | Provincial                     |
| WC Government Health Annual Report 2007 – 2008 <sup>10</sup> | Annual PSS – every 12 months<br>Staff satisfaction survey                                                                                                                      | Analysis of patient satisfaction survey, interventions planned for responses & for results of staff survey.                                                                                                                                                            | Provincial                     |
| WC Government Health Annual Report 2008 – 2009 <sup>11</sup> | Annual PSS – every 12 months                                                                                                                                                   | Performance measure indicator looks at how many complaints                                                                                                                                                                                                             | Provincial                     |

|                                                                                                                                               |                                                                                                                                                                                |                                                                                                                                                                                                                                                                                                 |            |
|-----------------------------------------------------------------------------------------------------------------------------------------------|--------------------------------------------------------------------------------------------------------------------------------------------------------------------------------|-------------------------------------------------------------------------------------------------------------------------------------------------------------------------------------------------------------------------------------------------------------------------------------------------|------------|
|                                                                                                                                               |                                                                                                                                                                                | resolved within 25 days. Findings of annual survey analysed, addressed with quality improvement plans formulated.                                                                                                                                                                               |            |
| WC Government Health Annual Report 2009 – 2010 <sup>12</sup>                                                                                  | Annual PSS – every 12 months<br>Complaints mechanism:<br>Departmental complaints procedure and suggestion box                                                                  | All complaints should be responded to within one month<br>Suggestion box serves a mechanism where suggestions are recorded and discussed weekly with action plans developed by Facility Management.<br>Findings of annual survey analysed, addressed with quality improvement plans formulated. | Provincial |
| Draft Regulations Relating to the Functioning of the District Health Councils in terms of the Western Cape District Health Councils Act, 2010 |                                                                                                                                                                                |                                                                                                                                                                                                                                                                                                 | Provincial |
| Western Cape District Health Councils Act, 5 of 2010                                                                                          |                                                                                                                                                                                |                                                                                                                                                                                                                                                                                                 | Provincial |
| “Towards Quality Care for Patients” National Core Standards for Health Establishments in SA <sup>13</sup>                                     | District Health Information System, audit tool & audit team<br>Hospital Board<br>Clinic Committee<br>Community Health Forums<br>PSS<br>Patient complaints<br>Feedback & forums | Standards for quality health services, measures compliance on six standards.                                                                                                                                                                                                                    | National   |
| 2020: The future of health care in the WC <sup>14</sup>                                                                                       |                                                                                                                                                                                | CHWs as direct link between family, community and health service.                                                                                                                                                                                                                               | Provincial |
| WC Government Health Annual Report 2010 – 2011 <sup>15</sup>                                                                                  | Annual PSS – every 12 months<br>Complaints committee<br>Independent Complaints Commission                                                                                      | MEC/Head of Department can refer complaints when internal processes for dealing with complaints have not addressed the issues to satisfaction of complainant. Findings of annual survey                                                                                                         | Provincial |

|                                                               |                                                                                                                                                                                                                                                  |                                                                                                                                                                                         |            |
|---------------------------------------------------------------|--------------------------------------------------------------------------------------------------------------------------------------------------------------------------------------------------------------------------------------------------|-----------------------------------------------------------------------------------------------------------------------------------------------------------------------------------------|------------|
|                                                               |                                                                                                                                                                                                                                                  | analysed, addressed with quality improvement plans formulated.                                                                                                                          |            |
| WC Health Facility Boards Amendment Act, 7 of 2012            |                                                                                                                                                                                                                                                  |                                                                                                                                                                                         | Provincial |
| Public Service Regulations, 2001 <sup>16</sup>                | Citizens' Complaints and Compliments Framework, March 2013                                                                                                                                                                                       | Stipulates exec authority shall establish/sustain service delivery programme for his/her dept– one key element is system or mechanism for (managing) complaints & compliments.          | National   |
| 20 Year Review: WC <sup>17</sup>                              | Ward committees<br>SMS-hotline<br>Complaints & compliments process<br>Client satisfaction surveys                                                                                                                                                | Reviews transformation since 1994 against the Batho Pele Principles.                                                                                                                    | Provincial |
| WC District Health Councils Amendment Act, 2013 <sup>18</sup> | District Health Councils                                                                                                                                                                                                                         | Amend 2010 Act to include members of health subdistricts in a district health councils.                                                                                                 | District   |
| WC Government Health Annual Report 2012 – 2013 <sup>19</sup>  | Annual client satisfaction surveys (CSS)– every 12 months<br>Complaints SMS and telephone hotline<br>Draft Western Cape Independent Health Complaints Committee Bill<br>Independent Complaints Committee                                         | Hotline piloted, complaints logged/tracked. A system for the referral of complaints. Findings of annual survey analysed, addressed with quality improvement plans formulated.           | Provincial |
| WC Independent Health Complaints Committee Regulations, 2014  |                                                                                                                                                                                                                                                  |                                                                                                                                                                                         | Provincial |
| Healthcare 2030: The Road to Wellness <sup>20</sup>           | SOP<br>Public engagement<br>Social protest action<br>Community communication mechanisms<br>PSS<br>Mechanisms for written, oral or telephonic complaints & compliments<br>Rapid surveys<br>Health hotline<br>District councils<br>Facility boards | Department's values include responsiveness. District Councils enable effective communication within the community. Facility boards enable effective communication within the community. | Provincial |

|                                                                                                                                                                                           |                                                                                                                                                          |                                                                                                                                                                                                                                    |                        |
|-------------------------------------------------------------------------------------------------------------------------------------------------------------------------------------------|----------------------------------------------------------------------------------------------------------------------------------------------------------|------------------------------------------------------------------------------------------------------------------------------------------------------------------------------------------------------------------------------------|------------------------|
|                                                                                                                                                                                           | Clinic committees                                                                                                                                        |                                                                                                                                                                                                                                    |                        |
| WC Government Health Annual Report 2013 – 2014 <sup>21</sup>                                                                                                                              | Annual CSS – every 12 months<br>Complaints hotline<br>Independent Health Complaints Committee<br>NGO/NPOs<br>Assessments against National Core Standards | Complaints referred to Committee for consideration. Report looks at number of compliments/complaints received. Information/complaints process displayed on notice boards at clinic. NGO utilised. Reports on patient satisfaction. | Provincial             |
| WC Independent Health Complaints Committee Act, 2 of 2014 <sup>22</sup>                                                                                                                   | Independent Health Complaints Committee                                                                                                                  | Establishment of Independent Health Complaints Committee.                                                                                                                                                                          | Provincial             |
| WC Government Health Annual Report 2014 – 2015 <sup>23</sup>                                                                                                                              | Annual CSS – every 12 months<br>Western Cape Independent Complaints Committee Act<br>Designated complaints champion/officer                              | Complaints champion/officer ensures compliance with the 25 day resolution date.                                                                                                                                                    | Provincial             |
| Regulations Governing the Financial Prescripts in terms of Western Cape Health Facility Boards and Committees Act, 2016                                                                   |                                                                                                                                                          |                                                                                                                                                                                                                                    | District               |
| Manual in terms of section 14 of the Promotion of Access to Information Act, 2000 <sup>24</sup>                                                                                           | Citizen rights                                                                                                                                           | Right of access to information.                                                                                                                                                                                                    | Provincial             |
| WC Government Health Annual Report 2015 – 2016 <sup>25</sup>                                                                                                                              | Annual CSS – every 12 months                                                                                                                             | Findings of annual survey analysed, addressed with quality improvement plans formulated.                                                                                                                                           | Provincial             |
| WC Health Facility Boards and Committees Act, 2016 <sup>26</sup>                                                                                                                          | Health Facility Boards Committees                                                                                                                        | Committee duties. Health Facility Board duties.                                                                                                                                                                                    | Provincial legislation |
| Regulations relating to the Criteria and Process for the Clustering of Primary Health Care Facilities in terms of the Western Cape Health Facility Boards and Committees Act, 2017        |                                                                                                                                                          |                                                                                                                                                                                                                                    | District               |
| Regulations Governing the Procedures for the Nomination of Members for Appointment to Health Facility Boards in terms of the Western Cape Health Facility Boards and Committees Act, 2017 |                                                                                                                                                          |                                                                                                                                                                                                                                    | Provincial             |
| SADOH Annual Report 2016/2017 <i>Annual Report 2016/2017</i> <sup>27</sup>                                                                                                                | Complaints/compliments procedures<br><i>MomConnect</i> programme                                                                                         | Benchmarks SADOH progress, including                                                                                                                                                                                               | National               |

|                                                                                                                                |                                                                                                                                                                                                                                                                                                                                                              |                                                                                                                                                                                                     |          |
|--------------------------------------------------------------------------------------------------------------------------------|--------------------------------------------------------------------------------------------------------------------------------------------------------------------------------------------------------------------------------------------------------------------------------------------------------------------------------------------------------------|-----------------------------------------------------------------------------------------------------------------------------------------------------------------------------------------------------|----------|
|                                                                                                                                | National Toll-Free Complaints Call Centre                                                                                                                                                                                                                                                                                                                    | improvement in responsiveness.                                                                                                                                                                      |          |
| National Guideline to Manage Complaints, Compliments and Suggestions in the Public Health Sector of South Africa <sup>28</sup> | Complaint, complement, suggestion procedure<br>Public Protector<br>Consumer Commission<br>Human Rights Commission<br>Legal System<br>Ombud in the OHSC<br>Professional Councils/Boards<br>Feedback forms<br>Complaint/compliment/suggestion boxes<br>Posters & pamphlets detailing feedback process<br>Complaint, Compliment and Suggestion Committee (CCSC) | Right to complain about healthcare received, guidelines/standards monitor whether health facilities adhere.                                                                                         | National |
| WC Government Health Annual Report 2016- 2017 <sup>29</sup>                                                                    | Provincial Health Council, District Health Councils, Hospital Boards<br>WC Health Facility Boards and Clinic Committees Act Regulations<br>Community Care Workers Health Committee<br>Patient Satisfaction Survey<br>Complaint Resolution Rate<br>National Core Standards                                                                                    | Consultations/meetings with Health Committee, including Community Questions Answers Session.                                                                                                        | District |
| SADOH Annual Report 2017/2018 <sup>30</sup>                                                                                    | <i>MomConnect</i> programme<br>OHSC<br>National Health Council (NHC)<br>Complaints/compliments procedure<br>National Survey: to measure Patient Experience of Care                                                                                                                                                                                           | Management of client complaints, suggestions and compliments, annual health facility surveys of patients' experience of care, health facility monitoring and reporting of Patient Safety Incidents. | National |
| Annual Inspection Report 2016/2017 and Annual Inspection Report 2018/2019 <sup>31,32</sup>                                     | OHSC<br>Annual Inspection Report<br>Complaint process<br>Complaints management and Ombud                                                                                                                                                                                                                                                                     | Monitors delivery of safe, quality care in compliance with the National Core Standards.<br>OHSC protects health/safety of users by investigating complaints. Ombud reviews annual inspections.      | National |
| Cape Metro District 2018: District Health Plan 2018/2019 to 2020/21 <sup>33</sup>                                              | Patient complaints<br>National Core Standards                                                                                                                                                                                                                                                                                                                | Highlights priorities against National Core Standards. Monitors                                                                                                                                     | District |

|                                                                                       |                                                                                                                                                         |                                                                                                                                                               |          |
|---------------------------------------------------------------------------------------|---------------------------------------------------------------------------------------------------------------------------------------------------------|---------------------------------------------------------------------------------------------------------------------------------------------------------------|----------|
|                                                                                       | Complaint and Compliment Register<br>District Health Committee<br>Clinic Committee and Facility Boards<br>NPOs                                          | complaints resolved within 25 days.                                                                                                                           |          |
| Cape Winelands District 2018: District Health Plan 2018/2019 to 2020/21 <sup>34</sup> | Patient complaints<br>National Core Standards<br>Complaint and Compliment Register<br>District Health Committee<br>Clinic Committee and Facility Boards | Highlights priorities against National Core Standards. Monitors complaints resolved within 25 days.                                                           | District |
| Central Karoo District 2018: District Health Plan 2018/2019 to 2020/21 <sup>35</sup>  | Patient complaints<br>National Core Standards<br>Complaint and Compliment Register<br>District Health Committee<br>Clinic Committee and Facility Boards | Promotes principles of Community Orientated Primary Care. Highlights priorities against National Core Standards. Monitors complaints resolved within 25 days. | District |
| Eden District 2018: District Health Plan 2018/2019 to 2020/21 <sup>36</sup>           | Patient complaints<br>National Core Standards<br>Complaint and Compliment Register<br>Clinic Committee and Facility Boards                              | Promotes principles of Community Orientated Primary Care. Highlights priorities against National Core Standards. Monitors complaints resolved within 25 days. | District |
| Overberg District 2018: District Health Plan 2018/2019 to 2020/21 <sup>37</sup>       | Patient complaints<br>National Core Standards<br>Complaint and Compliment Register<br>Clinic Committee and Facility Boards                              | Highlights priorities against National Core Standards. Monitors complaints resolved within 25 days.                                                           | District |
| West Coast District 2018: District Health Plan 2018/2019 to 2020/21 <sup>38</sup>     | Patient complaints<br>National Core Standards<br>Complaint and Compliment Register<br>Clinic Committee and Facility Boards                              | Highlights priorities against National Core Standards. Monitors complaints resolved within 25 days.                                                           | District |
| WBPHCOT Policy Framework and strategy <sup>39</sup>                                   | Ward-based Primary Health Care Outreach Teams (WBPHCOT)                                                                                                 | WBPHCOT intended to support delivery of PHC in South Africa.                                                                                                  | National |
| WC Government Health Annual Report 2017 – 2018 <sup>40</sup>                          | Community Care Workers<br>National Core Standards<br>Complaint system & Resolution Rate<br>Patient Satisfaction Survey<br>Waiting Time Survey Report    | Intention to have committees up and running by new financial year. The WC HFBs and Committee Act was                                                          | District |

|                                                                                                                         |                                                               |                                                                                                                                                                                         |          |
|-------------------------------------------------------------------------------------------------------------------------|---------------------------------------------------------------|-----------------------------------------------------------------------------------------------------------------------------------------------------------------------------------------|----------|
|                                                                                                                         | Health Facility Boards<br>Clinic Committees                   | promulgated in 2016 and regulations gazetted on 7 December 2017. Complaint resolution rate measured. Monthly Data Review and Facility Manager meetings. National Guideline implemented. |          |
| National Health Insurance Bill 2019 <sup>41</sup>                                                                       | Complaints Stakeholder Advisory Committee                     | To achieve universal access to quality health care services.                                                                                                                            | National |
| <i>What is MomConnect?</i> <sup>42</sup>                                                                                | MomConnect                                                    | Interactive mechanism to provide feedback on services.                                                                                                                                  | National |
| WC Government Health Annual Report 2018 – 2019 <sup>43</sup>                                                            |                                                               | With WC Health Facility Boards and Committee Act promulgated in 2016, establishment of clinic committees commenced in January 2018 and implementation work in progress.                 | District |
| Office of the Health Ombud Annual Report 2018/2019 <sup>44</sup>                                                        | OHSC<br>Health Ombud                                          | Reports on progress of the OHO to protect and promote the health/safety of users of healthcare in SA by investigating & reporting on complaints.                                        | National |
| Office of the Health Ombud website<br><a href="http://healthombud.org.za/">http://healthombud.org.za/</a> <sup>45</sup> | Online complaints submission portal<br>Complaints Call Centre | Online platform for citizens to learn more about the Health Ombud, lay complaints, access reports, publications, other resources.                                                       | National |

**References:**

1. South African Department of Health. *White Paper for the Transformation of the Health System in South Africa*. South Africa: South African Department of Health; 1997.
2. South African Department of Health. *Patient Rights Charter*. South Africa: South African Department of Health; 1999.
3. Western Cape Department of Health. *Western Cape Health Facility Boards Act, 7 of 2001*. South Africa: Western Cape Department of Health; 2001.



4. Western Cape Department of Health. *Western Cape Government Health Annual Report 2002 - 2003*. South Africa: Western Cape Department of Health; 2003.
5. South African Department of Health. *National Health Act 61 of 2003*. Pretoria: National Government of South Africa; 2004.
6. South African Department of Health. *Having Your Say: A Handbook for Ward Committees*. South Africa: South African Department of Health; 2005.
7. Western Cape Department of Health. *Western Cape Government Health Annual Report 2004 - 2005*. South Africa: Western Cape Department of Health; 2005.
8. Western Cape Department of Health. *Western Cape Government Health Annual Report 2006 – 2007*. South Africa: Western Cape Department of Health; 2007.
9. Western Cape Department of Health. *Western Cape Health Facility Boards - Manual 2007*. South Africa: Western Cape Department of Health; 2007.
10. Western Cape Department of Health. *Western Cape Government Health Annual Report 2007 – 2008*. South Africa: Western Cape Department of Health; 2008.
11. Western Cape Department of Health. *Western Cape Government Health Annual Report 2008 – 2009*. South Africa: Western Cape Department of Health; 2009.
12. Western Cape Department of Health. *Western Cape Government Health Annual Report 2009 – 2010*. South Africa: Western Cape Department of Health; 2010.
13. South African Department of Health. *Towards Quality Care for Patients: National Core Standards for Health Establishments in South Africa*. South Africa: South African Department of Health; 2011.
14. Western Cape Department of Health. *2020: The Future of Health Care in the Western Cape*. South Africa: Western Cape Department of Health; 2011.
15. Western Cape Department of Health. *Western Cape Government Health Annual Report 2010 – 2011*. South Africa: Western Cape Department of Health; 2011.
16. South African National Department of Public Service and Administration. *Public Service Regulations, 2001*. South Africa: South African National Department of Public Service and Administration; 2013.
17. Western Cape Department of Health. *20 Year Review: Western Cape*. South Africa: Western Cape Department of Health; 2013.
18. Western Cape Department of Health. *Western Cape District Health Councils Amendment Act, 2013*. South Africa: Western Cape Department of Health; 2013.
19. Western Cape Department of Health. *Western Cape Government Health Annual Report 2012 – 2013*. South Africa: Western Cape Department of Health; 2013.
20. Western Cape Department of Health. *Healthcare 2030: The Road to Wellness*. South Africa: Western Cape Department of Health; 2014.
21. Western Cape Department of Health. *Western Cape Government Health Annual Report 2013 - 2014*. South Africa: Western Cape Department of Health; 2014.
22. Western Cape Department of Health. *WC Independent Health Complaints Committee Act, 2 of 2014*. South Africa: Western Cape Department of Health; 2014.
23. Western Cape Department of Health. *WC Government Health Annual Report 2014 – 2015*. South Africa: Western Cape Department of Health; 2015.
24. Western Cape Department of Health. *Manual in Terms of Section 14 of the Promotion of Access to Information Act, 2000*. South Africa: Western Cape Department of Health; 2016.
25. Western Cape Department of Health. *Western Cape Government Health Annual Report 2015 – 2016*. South Africa: Western Cape Department of Health; 2016.
26. Western Cape Department of Health. *Western Cape Health Facility Boards and Committees Act*. South Africa: Western Cape Department of Health; 2016.
27. South African Department of Health. *Annual Report 2016/2017*. South Africa: South African Department of Health; 2017.
28. South African Department of Health. *National Guideline to Manage Complaints, Compliments and Suggestions in the Public Health Sector of South Africa*. South Africa: South African Department of Health; 2017.

29. Western Cape Department of Health. *Western Cape Government Health Annual Report 2016 – 2017*. South Africa: Western Cape Department of Health; 2017.
30. South African Department of Health. *Annual Report 2017/2018*. South Africa: South African Department of Health; 2018.
31. Office of Health Standards Compliance. *Annual Inspection Report 2016/2017*. South Africa: OHSC; 2017.
32. Office of Health Standards Compliance. *Annual Inspection Report 2017/2018*. South Africa: OHSC; 2017.
33. Western Cape Department of Health. *Cape Metro District 2018: District Health Plan 2018/2019 to 2020/2021*. South Africa: Western Cape Department of Health; 2018.
34. Western Cape Department of Health. *Cape Winelands District 2018: District Health Plan 2018/2019 to 2020/2021*. South Africa: Western Cape Department of Health; 2018.
35. Western Cape Department of Health. *Central Karoo District 2018: District Health Plan 2018/2019 to 2020/2021*. South Africa: Western Cape Department of Health; 2018.
36. Western Cape Department of Health. *Eden District 2018: District Health Plan 2018/2019 to 2020/2021*. South Africa: Western Cape Department of Health; 2018.
37. Western Cape Government. *Overberg District 2018: District Health Plan 2018/2019 to 2020/2021*. South Africa: Western Cape Department of Health; 2018.
38. Western Cape Department of Health. *West Coast District 2018: District Health Plan 2018/2019 to 2020/2021*. South Africa: Western Cape Department of Health; 2018.
39. South African Department of Health. *WBPHCOT Policy Framework and Strategy*. South Africa: South African Department of Health; 2018.
40. Western Cape Department of Health. *Western Cape Government Health Annual Report 2017 - 2018*. South Africa: Western Cape Department of Health; 2018.
41. South African Department of Health. *National Health Insurance Bill 2019*. South Africa: South African Department of Health; 2019.
42. South African Department of Health. What is MomConnect? South Africa Department of health. Published 2019. <http://www.health.gov.za/index.php/mom-connect>. Accessed December 9, 2019.
43. Western Cape Department of Health. *Western Cape Government Health Annual Report 2018 - 2019*. South Africa: Western Cape Department of Health; 2019.
44. Office of the Health Ombud. *Office of the Health Ombud Annual Report 2018/2019*. South Africa: OHO
45. Office of the Health Ombud. Office of the Health Ombud. <http://healthombud.org.za>. Published 2020. Accessed December 12, 2019.
